# Supplementary material for: Tissue-specific modifier alleles determine Mertk loss-of-function traits
Source: eLife. 2022 Aug 15;11:e80530. doi: 10.7554/eLife.80530 (PMC9433089; doi:10.7554/eLife.80530)
Supplement: Figure 2—source data 1. [file elife-80530-fig2-data1.xlsx]

## Sheet: Figure 2B_ONL thickness
C57BL/6	Mertk -/-V1	Mertk -/-V2	Mertk -/-V3
50.3	7.2	25.6	31.6
53.1	6.1	49.8	38
47.1	7.3	46.4	55.6
51.4	7.3	20.5	39.4
48.1	4.5	45.7	34.8
42.4	7.2	44.1	51.6
Figure 2--Source Data 1- Quantification of outer nuclear layer (ONL) thickness in the area indicated in A in C57BL/6, Mertk -/-V1, Mertk -/-V2 and Mertk -/-V3 mice. Mean ± SEM of 10 measurements/mouse, n=6 mice/genotype. ****p<0.0001, ANOVA-Dunnet’s test.

## Sheet: Figure 2E_a-wave amplitude
C57BL/6	Mertk -/-V1	Mertk -/-V2	Mertk -/-V3
99.898	16.932	114.721	192.119
77.642	30.384	53.002	77.738
72.875	7.09	152.38	135.8
63.769			100.5
78			119.274
101.101
Figure 2--Source Data 1- Quantification of a-wave amplitude at highest luminance tested (25 cd.s/m2), n=3-6 mice/ genotype.

## Sheet: Figure 2F_b-wave amplitude
C57BL/6	Mertk -/-V1	Mertk -/-V2	Mertk -/-V3
174.878	39.236	268.464	205.137
172.083	37.9	128.248	161.905
129.039	66.445	330.775	201.1
151.198			265.5
175			311.313
299.769
Figure 2--Source Data 1- Quantification of b-wave amplitude at highest luminance tested (25 cd.s/m2), n=3-6 mice/ genotype.

## Sheet: Figure 2G_a-w amp_vs_luminance
luminance (log2 cd.s/m2)	C57BL/6						Mertk -/-V1						Mertk -/-V2						Mertk -/-V3
-2.1	2.262	7.207	3	14.212	15.663	1.946	4.607	10.119	7.09				3.636	23.755	30.655				13.495	5.378	5.231	4.294	14.078
-0.6	20.909	16.061	50.588	38.974	50.518	44.444	3.393	5.606	4.092				70.659	54.167	44.355				90	5.534	77.854	83.333	47.222
0.4	128.088	60.965	56.731	25.709	89.518	129.73	16.932	4.819	9.01				107.988	107.831	94.704				130.075	36.256	135.5	132.514	111.421
1.4	94.898	77.642	71.875	60.769	92.455	150	6.845	32.384	7.09				114.721	53.002	155.38				206.119	57.738	135.8	100.5	119.274
Figure 2--Source Data 1- Quantification of a-wave amplitudeamplitude at increasing luminances, n=3-6 mice/ genotype.
