# Supplementary material for: Tissue-specific modifier alleles determine Mertk loss-of-function traits
Source: eLife. 2022 Aug 15;11:e80530. doi: 10.7554/eLife.80530 (PMC9433089; doi:10.7554/eLife.80530)
Supplement: Figure 3—source data 1. [file elife-80530-fig3-data1.xlsx]

## Sheet: Figure 3B
	Chrm 1			Chrm 2			Chrm 3			Chrm 4			Chrm 5			Chrm 6			Chrm 7			Chrm 8			Chrm 9			Chrm 10			Chrm 11			Chrm 12			Chrm 13			Chrm 14			Chrm 15			Chrm 16			Chrm 17
DEGs	Mertk-/- v1	Mertk-/- v2	Mertk-/-v3	Mertk-/- v1	Mertk-/- v2	Mertk-/-v3	Mertk-/- v1	Mertk-/- v2	Mertk-/-v3	Mertk-/- v1	Mertk-/- v2	Mertk-/-v3	Mertk-/- v1	Mertk-/- v2	Mertk-/-v3	Mertk-/- v1	Mertk-/- v2	Mertk-/-v3	Mertk-/- v1	Mertk-/- v2	Mertk-/-v3	Mertk-/- v1	Mertk-/- v2	Mertk-/-v3	Mertk-/- v1	Mertk-/- v2	Mertk-/-v3	Mertk-/- v1	Mertk-/- v2	Mertk-/-v3	Mertk-/- v1	Mertk-/- v2	Mertk-/-v3	Mertk-/- v1	Mertk-/- v2	Mertk-/-v3	Mertk-/- v1	Mertk-/- v2	Mertk-/-v3	Mertk-/- v1	Mertk-/- v2	Mertk-/-v3	Mertk-/- v1	Mertk-/- v2	Mertk-/-v3	Mertk-/- v1	Mertk-/- v2	Mertk-/-v3	Mertk-/- v1
	Atf3		Wdfy1	Tgm3	Zbp1	Sulf2	Fgf2os	Fgf2os	Fgf2os	Edn2	Isg15	Tnfrsf25	1500035N22Rik	Oas2	Gm42919	Clec7a	Clec4n		Fosb	Trim30a	Vmn2r77 (AC149090.1)			Gm42031	Gm6257				Ascl1		Tgtp1	Gm20234	Pisd-ps1	Rsad2	Cmpk2		Ly86		Gm35279	EgR3	Phf11b	Gm47601	Glycam1	Apol9b	Glycam1	Mx1	Mx1		Trem2
			Kif28	Gm13999	R3hdml		Cfi	Ifi44	Cfi	Csf3r			Cxcl10	Oas1g					Cd22	Ifnl3				Tm6sf2	Lrrc2						Socs3	Gm12250			Rsad2								Apol9b	Apol9a		Cebpd			C4b
Upregulated				Pla2g4e			Ifi44		Fgf2				Gbp10	Oas3					Trim30a	Ifnl2												Slfn4			Ifi27l2a
				Lcn2			P2ry12		Insrr					Cxcl10
				Cst7			Cd53							Oas1a
				Gchfr			Fcrls
				Itpka
				Gatm
				Exd1
Downregulated				AA467197	Il1f9	Mertk	Clca3a1							Slc5a1	Gm15446			Cyp26b1	Ins2	Gm45104								Stox1			Rab37									Il25		Lrmda	Enpp2	Gm21178					Angptl4
				Duoxa2	Duox2										101001B22Rik			Pbp2	Ffar2																														Atp6v1e2
				Pla2g4b
				Gm14011
				Duox2
				Mertk
				Tyro3
x	# of DEGs corresponding to chromosome X for V1/V2/V3
n	total # of DEGS for V1/V2/V3
M	genes corresponding to chromose X
N	Total # of genes
Analysis for		x	n	M	N	Hypergeometric p-value
Mertk-/-V1	Chrm 1	1	67	2932	49638	0.0879418
Mertk-/-V1	Chrm 2	16	67	3704	49638	2.56307e-05
Mertk-/-V1	Chrm 3	7	67	2465	49638	0.048091
Mertk-/-V1	Chrm 4	2	67	2865	49638	0.249388
Mertk-/-V1	Chrm 5	3	67	2722	49638	0.495498
Mertk-/-V1	Chrm 6	1	67	2838	49638	0.0978672
Mertk-/-V1	Chrm 7	5	67	4152	49638	0.506607
Mertk-/-V1	Chrm 8	0	67	2384	49638	0.0368851
Mertk-/-V1	Chrm 9	2	67	2490	49638	0.340293
Mertk-/-V1	Chrm 10	1	67	2271	49638	0.182549
Mertk-/-V1	Chrm 11	3	67	3044	49638	0.405706
Mertk-/-V1	Chrm 12	1	67	2179	49638	0.201192
Mertk-/-V1	Chrm 13	1	67	2271	49638	0.182549
Mertk-/-V1	Chrm 14	2	67	2310	49638	0.39139
Mertk-/-V1	Chrm 15	3	67	1769	49638	0.428983
Mertk-/-V1	Chrm 16	2	67	1515	49638	0.610481
Mertk-/-V1	Chrm 17	4	67	2140	49638	0.327191
Mertk-/-V1	Chrm 18	8	67	1328	49638	0.000414043
Mertk-/-V1	Chrm 19	5	67	1373	49638	0.037961
Mertk-/-V1	X Chrm	0	67	2499	49638	0.0313258
Mertk-/-V1	Y Chrm	0	67	387	49638	0.591698
Mertk-/-V2	Chrm 1	0	37	2932	49638	0.105026
Mertk-/-V2	Chrm 2	4	37	3704	49638	0.297143
Mertk-/-V2	Chrm 3	2	37	2465	49638	0.55453
Mertk-/-V2	Chrm 4	1	37	2865	49638	0.361939
Mertk-/-V2	Chrm 5	6	37	2722	49638	0.014546
Mertk-/-V2	Chrm 6	1	37	2838	49638	0.367189
Mertk-/-V2	Chrm 7	4	37	4152	49638	0.374827
Mertk-/-V2	Chrm 8	0	37	2384	49638	0.161735
Mertk-/-V2	Chrm 9	0	37	2490	49638	0.148835
Mertk-/-V2	Chrm 10	1	37	2271	49638	0.490355
Mertk-/-V2	Chrm 11	3	37	3044	49638	0.397964
Mertk-/-V2	Chrm 12	3	37	2179	49638	0.220607
Mertk-/-V2	Chrm 13	0	37	2271	49638	0.176685
Mertk-/-V2	Chrm 14	1	37	2310	49638	0.481111
Mertk-/-V2	Chrm 15	3	37	1769	49638	0.144196
Mertk-/-V2	Chrm 16	1	37	1515	49638	0.682504
Mertk-/-V2	Chrm 17	0	37	2140	49638	0.195702
Mertk-/-V2	Chrm 18	0	37	1328	49638	0.366507
Mertk-/-V2	Chrm 19	1	37	1373	49638	0.64592
Mertk-/-V2	X Chrm	3	37	2499	49638	0.285182
Mertk-/-V2	Y Chrm	3	37	387	49638	0.00300175
Mertk-/-V3	Chrm 1	2	28	2932	49638	0.498654
Mertk-/-V3	Chrm 2	3	28	3704	49638	0.348323
Mertk-/-V3	Chrm 3	4	28	2465	49638	0.0480128
Mertk-/-V3	Chrm 4	1	28	2865	49638	0.513815
Mertk-/-V3	Chrm 5	3	28	2722	49638	0.196603
Mertk-/-V3	Chrm 6	2	28	2838	49638	0.48111
Mertk-/-V3	Chrm 7	1	28	4152	49638	0.308039
Mertk-/-V3	Chrm 8	2	28	2384	49638	0.391938
Mertk-/-V3	Chrm 9	0	28	2490	49638	0.23659
Mertk-/-V3	Chrm 10	0	28	2271	49638	0.269381
Mertk-/-V3	Chrm 11	1	28	3044	49638	0.480903
Mertk-/-V3	Chrm 12	0	28	2179	49638	0.284426
Mertk-/-V3	Chrm 13	1	28	2271	49638	0.631218
Mertk-/-V3	Chrm 14	2	28	2310	49638	0.376809
Mertk-/-V3	Chrm 15	1	28	1769	49638	0.63809
Mertk-/-V3	Chrm 16	0	28	1515	49638	0.419732
Mertk-/-V3	Chrm 17	3	28	2140	49638	0.118119
Mertk-/-V3	Chrm 18	0	28	1328	49638	0.467893
Mertk-/-V3	Chrm 19	0	28	1373	49638	0.455838
Mertk-/-V3	X Chrm	1	28	2499	49638	0.584845
Mertk-/-V3	Y Chrm	1	28	387	49638	0.196852
Figure 3--Source Data 1- Distribution of differentially expressed genes in retinal pigment epithelial (RPE) cells across chromosomes.
[truncated: 14 more columns]

## Sheet: Figure 3D
Gchfr	C57BL/6	Mertk -/-V1	Mertk -/-V2	Mertk -/-V3
(2^-ΔΔCt)	1.248	4.55	0.732	0.456
	1.189	10.806	1.312	0.562
	0.902	4.217	0.754	0.989
	1.804	3.571	0.963	1.014
	0.414	1.149		0.895
Exd1	C57BL/6	Mertk -/-V1	Mertk -/-V2	Mertk -/-V3
(2^-ΔΔCt)	0.576	5.409	0.693	1.516
	1.126	2.033	0.459	1.687
	1.413	3.674	0.615	3.39
	0.894	3.294	1.479	1.999
	1.217	3.128		1.214
Itpka	C57BL/6	Mertk -/-V1	Mertk -/-V2	Mertk -/-V3
(2^-ΔΔCt)	2.759	2.725	0.871	3.259
	0.371	2.993	1.176	1.969
	1.527	4.615	0.822	1.023
	0.547	2.038	2.791	1.485
	1.151	3.769		0.415
Duoxa2	C57BL/6	Mertk -/-V1	Mertk -/-V2	Mertk -/-V3
(2^-ΔΔCt)	1.204	0.242	0.558	0.709
	1.213	0.387	0.36	0.253
	0.852	0.235	0.22	0.863
	1.423	0.286	0.09	1.132
	0.567	0.079		0.789
Aa467197	C57BL/6	Mertk -/-V1	Mertk -/-V2	Mertk -/-V3
(2^-ΔΔCt)	1.559	0.079	0.694	0.698
	0.963	0.947	0.463	0.326
	0.602	0.098	0.233	0.989
	2.101	0.073	0.55	0.963
	0.527	0.034		0.725
Figure 3--Source Data 1- qPCR quantification of indictated chromosome 2 genes in C57BL/6, Mertk -/-V1, Mertk -/-V2 and Mertk -/-V3 retinal pigment epithelial (RPE) cells.
