# Supplementary material for: Tissue-specific modifier alleles determine Mertk loss-of-function traits
Source: eLife. 2022 Aug 15;11:e80530. doi: 10.7554/eLife.80530 (PMC9433089; doi:10.7554/eLife.80530)
Supplement: Figure 5—source data 1. [file elife-80530-fig5-data1.xlsx]

## Sheet: Figure 5B_TFS
Day post tumor implantation	C57BL/6	Mertk -/-V1	Mertk -/-V2	Mertk -/-V3
20	1			1
20	1			1
22				1
24	1		1
24	1
26	1	1		1
26	1			1
26	1			1
28	1		1
28	1		1
28	1		1
28	1
28	1
28	1
30				1
31	1		1
31	1		1
31			1
33	1		1
33	1		1
54		0
54		0
54		0
54		0
54		0
54		0
54		0
54		0
79		0
79		0
79		0
79		0
79		0
79		0
79		0
Figure 5--Source Data 1- Tumor free survival (TFS) in C57BL/6, Mertk -/-V1, Mertk -/-V2 and Mertk -/-V3 mice following implantation with YUMM1.7 melanoma cells. ('1' indicates mice had measurable tumor at the time indicated in column A)

## Sheet: Figure 5B_OS
Day post tumor implantation	C57BL/6	Mertk -/-V1	Mertk -/-V2	Mertk -/-V3
37				1
37				1
37				1
40	1		1
40	1
40	1
42	1		1
42	1
42	0
43				1
45	1		1
45	1
47	1		1
47	1		1
47	1
47	1
49	1			1
49				1
51	1			1
52			1
52			1
52			1
54		1
56	1		1
56	1
60		0
60		0
60		0
60		0
60		0
60		0
60		0
60		0
62	1
79		0
79		0
79		0
79		0
79		0
79		0
79		0
Figure 5--Source Data 1- Overall survival (OS) in C57BL/6, Mertk -/-V1, Mertk -/-V2 and Mertk -/-V3 mice following implantation with YUMM1.7 melanoma cells. ('1' indicates mice had measurable tumor at the time indicated in column A)

## Sheet: Figure 5D
Day post tumor implantation	C57BL/6	Mertk -/-V1	Mertk -/-V2	Mertk -/-V3
21	1
28	1
28	1
30				1
30				1
30				1
30	1
30			1
30			1
31			1
31	1
32	1
33			1
33			1
34				1
34				1
35	1
36	1
37			1
37	1			1
37	1
38	1			1
40			1
42	1			1
42	1
47	1
49			1
53		1
63		0
63		0
80	0
80		0
80		0
80		0
80	0	0
80		0
80		0
80		0
Figure 5--Source Data 1- Overall survival (OS) in C57BL/6, Mertk -/-V1, Mertk -/-V2 and Mertk -/-V3 mice following implantation with GL261 gliobastoma cells. ('1' indicates mice had measurable tumor at the time indicated in column A)
