# Supplementary material for: Tissue-specific modifier alleles determine Mertk loss-of-function traits
Source: eLife. 2022 Aug 15;11:e80530. doi: 10.7554/eLife.80530 (PMC9433089; doi:10.7554/eLife.80530)
Supplement: Figure 5—source data 2. [file elife-80530-fig5-data2.xlsx]

## Sheet: Fig5_FS1B
Day post tumor implantation	C57BL/6	Mertk -/-V1
28	1
29	1	1
29		1
32	1	1
33	1
34		1
36	1
36	1
39		1
39		1
42	1	1
47		1
47		1
49	1	1
55		1
66	1
Figure 5--Source Data 2- Overall survival (OS) in C57BL/6 and Mertk -/-V1 mice following implantation with GL261 glioblastoma cells. ('1' indicates mice had measurable tumor at the time indicated in column A)
