# Supplementary material for: Tissue-specific modifier alleles determine Mertk loss-of-function traits
Source: eLife. 2022 Aug 15;11:e80530. doi: 10.7554/eLife.80530 (PMC9433089; doi:10.7554/eLife.80530)
Supplement: Figure 6—source data 1. [file elife-80530-fig6-data1.xlsx]

## Sheet: Figure 6A
	Chrm 1			Chrm 2			Chrm 3			Chrm 4			Chrm 5			Chrm 6			Chrm 7			Chrm 8			Chrm 9			Chrm 10			Chrm 11			Chrm 12			Chrm 13			Chrm 14			Chrm 15			Chrm 16			Chrm 17
DEGs	Mertk-/- v1	Mertk-/- v2	Mertk-/-v3	Mertk-/- v1	Mertk-/- v2	Mertk-/-v3	Mertk-/- v1	Mertk-/- v2	Mertk-/-v3	Mertk-/- v1	Mertk-/- v2	Mertk-/-v3	Mertk-/- v1	Mertk-/- v2	Mertk-/-v3	Mertk-/- v1	Mertk-/- v2	Mertk-/-v3	Mertk-/- v1	Mertk-/- v2	Mertk-/-v3	Mertk-/- v1	Mertk-/- v2	Mertk-/-v3	Mertk-/- v1	Mertk-/- v2	Mertk-/-v3	Mertk-/- v1	Mertk-/- v2	Mertk-/-v3	Mertk-/- v1	Mertk-/- v2	Mertk-/-v3	Mertk-/- v1	Mertk-/- v2	Mertk-/-v3	Mertk-/- v1	Mertk-/- v2	Mertk-/-v3	Mertk-/- v1	Mertk-/- v2	Mertk-/-v3	Mertk-/- v1	Mertk-/- v2	Mertk-/-v3	Mertk-/- v1	Mertk-/- v2	Mertk-/-v3	Mertk-/- v1
Upregulated	Slamf8		Wdfy1	Gm14085 (Slc28a2b)	9830144P21Rik	Cnbd2				Gm12404		Efcab7		Oasl1	Oasl1	Gm43197	Gm43197	Cd4	Ceacam16		Dnaaf3	Arhgef18	Gm42031	Gm42031	Mmp12	Gm38077		Lilrb4a			Mgl2	Mgl2	Camk2b				Gm16907	Gm16907		Bmpr1a	Bmpr1a	Ednrb		Ly6a		Mx1	Mx1		Olfr111
				Gchfr	Sptbn5	Mmp9								AI480526					Gm45867				Arhgef18								Tnfsf13os	Camk2b	Mgl2							Acod1	4930579G18Rik
				Plcb1	Chac1	Slc12a5													Itgax													Tnfsf13
				Rhov															Prkcg
				Exd1
				Gpr176
				Gatm
Downregulated	Fn1		Cd244a	AA467197		Mertk						Id3			Gm15446		Igf2bp3	Gdf3	Fosb	Fosb							Cspg4							Fos	Fos		Ctla2a	Tmem267	Tmem267			Lrmda	Col14a1						Dusp1
				Mertk		Pmepa1						Epha2															Cx3cr1																						H2-Ob
				Thbs1																							Cd276
				Plxdc2
				Pmepa1
x	# of DEGs corresponding to chromosome X for V1/V2/V3
n	total # of DEGS for V1/V2/V3
M	genes corresponding to chromose X
N	Total # of genes
Analysis for		x	n	M	N	Hypergeometric p-value
Mertk-/-V1	Chrm 1	2	43	2932	49638	0.52939
Mertk-/-V1	Chrm 2	12	43	3704	49638	5.03424e-05
Mertk-/-V1	Chrm 3	0	43	2465	49638	0.111788
Mertk-/-V1	Chrm 4	1	43	2865	49638	0.281807
Mertk-/-V1	Chrm 5	0	43	2722	49638	0.088375
Mertk-/-V1	Chrm 6	1	43	2838	49638	0.286797
Mertk-/-V1	Chrm 7	5	43	4152	49638	0.289324
Mertk-/-V1	Chrm 8	1	43	2384	49638	0.381668
Mertk-/-V1	Chrm 9	1	43	2490	49638	0.357627
Mertk-/-V1	Chrm 10	1	43	2271	49638	0.408584
Mertk-/-V1	Chrm 11	2	43	3044	49638	0.50412
Mertk-/-V1	Chrm 12	1	43	2179	49638	0.431478
Mertk-/-V1	Chrm 13	2	43	2271	49638	0.591416
Mertk-/-V1	Chrm 14	2	43	2310	49638	0.600856
Mertk-/-V1	Chrm 15	1	43	1769	49638	0.543761
Mertk-/-V1	Chrm 16	1	43	1515	49638	0.620692
Mertk-/-V1	Chrm 17	3	43	2140	49638	0.282884
Mertk-/-V1	Chrm 18	4	43	1328	49638	0.0275581
Mertk-/-V1	Chrm 19	3	43	1373	49638	0.115659
Mertk-/-V1	X Chrm	0	43	2499	49638	0.108373
Mertk-/-V1	Y Chrm	0	43	387	49638	0.71412
Mertk-/-V2	Chrm 1	0	27	2932	49638	0.193145
Mertk-/-V2	Chrm 2	3	27	3704	49638	0.327334
Mertk-/-V2	Chrm 3	0	27	2465	49638	0.252684
Mertk-/-V2	Chrm 4	0	27	2865	49638	0.200769
Mertk-/-V2	Chrm 5	2	27	2722	49638	0.440254
Mertk-/-V2	Chrm 6	2	27	2838	49638	0.462007
Mertk-/-V2	Chrm 7	1	27	4152	49638	0.327537
Mertk-/-V2	Chrm 8	2	27	2384	49638	0.374611
Mertk-/-V2	Chrm 9	1	27	2490	49638	0.604478
Mertk-/-V2	Chrm 10	0	27	2271	49638	0.282303
Mertk-/-V2	Chrm 11	3	27	3044	49638	0.228111
Mertk-/-V2	Chrm 12	1	27	2179	49638	0.702508
Mertk-/-V2	Chrm 13	2	27	2271	49638	0.352052
Mertk-/-V2	Chrm 14	2	27	2310	49638	0.359866
Mertk-/-V2	Chrm 15	1	27	1769	49638	0.624709
Mertk-/-V2	Chrm 16	1	27	1515	49638	0.567047
Mertk-/-V2	Chrm 17	1	27	2140	49638	0.674377
Mertk-/-V2	Chrm 18	2	27	1328	49638	0.162221
Mertk-/-V2	Chrm 19	1	27	1373	49638	0.531187
Mertk-/-V2	X Chrm	1	27	2499	49638	0.602716
Mertk-/-V2	Y Chrm	1	27	387	49638	0.190537
Mertk-/-V3	Chrm 1	2	33	2932	49638	0.588185
Mertk-/-V3	Chrm 2	5	33	3704	49638	0.0958728
Mertk-/-V3	Chrm 3	0	33	2465	49638	0.186111
Mertk-/-V3	Chrm 4	3	33	2865	49638	0.296672
Mertk-/-V3	Chrm 5	2	33	2722	49638	0.546864
Mertk-/-V3	Chrm 6	2	33	2838	49638	0.57002
Mertk-/-V3	Chrm 7	1	33	4152	49638	0.224539
Mertk-/-V3	Chrm 8	1	33	2384	49638	0.525085
Mertk-/-V3	Chrm 9	3	33	2490	49638	0.228592
Mertk-/-V3	Chrm 10	0	33	2271	49638	0.213114
Mertk-/-V3	Chrm 11	2	33	3044	49638	0.60912
Mertk-/-V3	Chrm 12	0	33	2179	49638	0.227211
Mertk-/-V3	Chrm 13	1	33	2271	49638	0.550525
Mertk-/-V3	Chrm 14	2	33	2310	49638	0.458328
Mertk-/-V3	Chrm 15	0	33	1769	49638	0.301823
Mertk-/-V3	Chrm 16	0	33	1515	49638	0.359437
Mertk-/-V3	Chrm 17	3	33	2140	49638	0.168774
Mertk-/-V3	Chrm 18	2	33	1328	49638	0.22063
Mertk-/-V3	Chrm 19	1	33	1373	49638	0.603846
Mertk-/-V3	X Chrm	2	33	2499	49638	0.500117
Mertk-/-V3	Y Chrm	1	33	387	49638	0.227694
Figure 6--Source Data 1- Distribution of differentially expressed genes in bone-marrow-derived macrophages (BMDMs) across chromosomes.
[truncated: 14 more columns]

## Sheet: Figure 6C
Gchfr	C57BL/6	Mertk -/-V1	Mertk -/-V2	Mertk -/-V3
(2^-ΔΔCt)	1.026	11.648	1.39	1.97
	0.981	11.158	1.647	1.605
	1.041	10.2	1.678	1.689
	0.821	15.022	1.701	1.935
	1.153	13.488	1.724	1.604
Exd1	C57BL/6	Mertk -/-V1	Mertk -/-V2	Mertk -/-V3
(2^-ΔΔCt)	0.971	2.616	0.795	1.309
	0.888	2.228	1.051	0.89
	0.761	2.817	0.84	0.84
	0.742	2.834	0.747	1.052
	0.776	2.499	0.783	0.946
Gatm	C57BL/6	Mertk -/-V1	Mertk -/-V2	Mertk -/-V3
(2^-ΔΔCt)	1.032	2.717	1.193	1.469
	0.91	2.419	1.463	1.397
	0.915	2.341	1.703	1.607
	1.028	3.02	1.638	1.688
	1.133	2.734	1.484	1.395
Aa467197	C57BL/6	Mertk -/-V1	Mertk -/-V2	Mertk -/-V3
(2^-ΔΔCt)	1.144	0.048	0.806	0.629
	0.911	0.037	1.326	0.696
	1.028	0.05	1.717	0.577
	1.202	0.041	1.505	0.865
	0.769	0.036	1.363	0.834
Thbs1	C57BL/6	Mertk -/-V1	Mertk -/-V2	Mertk -/-V3
(2^-ΔΔCt)	1.087	0.287	0.77	1.705
	0.975	0.333	1.195	2.008
	0.998	0.412	1.45	1.731
	0.971	0.527	1.561	1.765
	0.977	0.371	1.557	1.608
Pmepa1	C57BL/6	Mertk -/-V1	Mertk -/-V2	Mertk -/-V3
(2^-ΔΔCt)	1.043	0.621	0.458	0.86
	1.098	0.444	0.547	0.778
	1.176	0.808	0.983	0.732
	1.244	0.489	1.115	1.099
	0.595	0.583	1.355	0.959
Figure 6--Source Data 1- qPCR quantification of indictated chromosome 2 genes in C57BL/6, Mertk -/-V1, Mertk -/-V2 and Mertk -/-V3 bone-marrow-derived macrophages (BMDMs).

## Sheet: Figure 6E
	C57BL/6	Mertk -/-V1
%pHrodo+ BMDMs	20.8	9.33
	17.4	9.95
	17.5	8.91
	18.5	9.34
	22.1	8.38
	C57BL/6	Mertk -/-V2
%pHrodo+ BMDMs	37.2	14.6
	27.2	11
	29.4	11.7
	C57BL/6	Mertk -/-V3
%pHrodo+ BMDMs	26.8	10.5
	28	10.5
	32.6	10.7
	27.8	9.73
	28.6	11
	25.3	8.35
Figure 6--Source Data 1- Quantification of uptake of pHrodo labeled apoptotic thymocytes C57BL/6, Mertk -/-V1, Mertk -/-V2 and Mertk -/-V3 bone-marrow-derived macrophages (BMDMs).

## Sheet: Figure 6F TFS
Days post-tumor implantation	C57BL/6	Mertk -/-V2 Tyro3 -/-V2
18	1
20	1
20	1
22	1	1
22		1
22		1
25	1	1
25	1	1
25		1
25		1
32	1
Figure 6--Source Data 1- Tumor free survival (TFS) in C57BL/6 and Mertk -/-V2 Tyro3 -/-V2 mice following implantation with YUMM1.7 melanoma cells. ('1' indicates mice had measurable tumor at the time indicated in column A)

## Sheet: Figure 6F OS
Days post-tumor implantation	C57BL/6	Mertk -/-V2 Tyro3 -/-V2
36	0
39	1	1
39		1
41	1	0
43	1	1
43	1
49	1	1
54		1
60		1
74	1
Figure 6--Source Data 1- Overall survival (OS) in C57BL/6 and Mertk -/-V2 Tyro3 -/-V2 mice following implantation with YUMM1.7 melanoma cells. ('1' indicates mice had measurable tumor at the time indicated in column A)

## Sheet: Figure 6G
Days post-tumor implantation	C57BL/6	Mertk -/-V2 Tyro3 -/-V2
27		1
29		1
40		1
56		1
60		1
76		0
33	1
34	1
42	1
67	1
76	0
Figure 6--Source Data 1- Overall survival (OS) in C57BL/6 and Mertk -/-V2 Tyro3 -/-V2 mice following implantation with GL261 glioblastoma cells. ('1' indicates mice had measurable tumor at the time indicated in column A)
