# Supplementary material for: Tissue-specific modifier alleles determine Mertk loss-of-function traits
Source: eLife. 2022 Aug 15;11:e80530. doi: 10.7554/eLife.80530 (PMC9433089; doi:10.7554/eLife.80530)
Supplement: Figure 6—source data 2. [file elife-80530-fig6-data2.xlsx]

## Sheet: Fig 6_FS1_A,B
	C57BL/6	Mertk -/-V1	Mertk -/-V2
MERTK (MFI)	2255	913	1027
	2536	896	954
	2627	904	990
	2577	906	920
	2275	877
	C57BL/6	Mertk -/-V3
MERTK (MFI)	4876	1189
	5256	1166
	5231	1253
	5209	1210
	5297	1320
	4836	1328
Figure 6--Source Data 2- Quantification of MERTK levels in bone-marrow-derived macrophages (BMDMs) from C57BL/6, Mertk -/-V1, Mertk -/-V2 and Mertk -/-V3 mice.
