# Supplementary material for: Tissue-specific modifier alleles determine Mertk loss-of-function traits
Source: eLife journal article supplement (doi:10.7554/elife.80530), 2022-08-15
Supplement: supp [file elife-80530-supp-v1.zip]

**A**

P1-P2

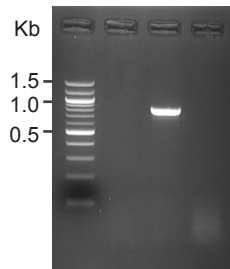

C57BL/6  
Mertk <sup>+/V1</sup>  
Mertk <sup>+/V2</sup>

**B**

P3-P4

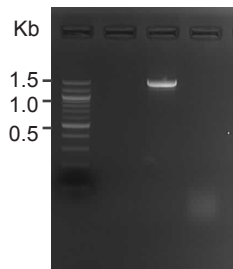

C57BL/6  
Mertk <sup>+/V1</sup>  
Mertk <sup>+/V2</sup>

**C**

P5-P6

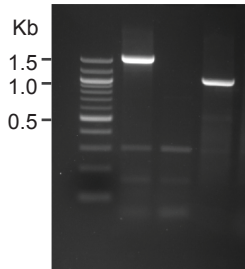

C57BL/6  
Mertk <sup>+/V1</sup>  
Mertk <sup>+/V2</sup>

**D**

P9-P10

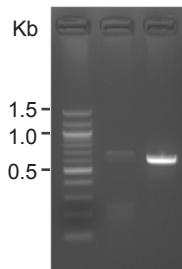

C57BL/6  
Mertk <sup>+/V2</sup> Tyro3 <sup>+/V2</sup>
