# Supplementary material for: Tissue-specific modifier alleles determine Mertk loss-of-function traits
Source: eLife journal article supplement (doi:10.7554/elife.80530), 2022-08-15
Supplement: supp [file Figure 1_Source Data 1.xlsx]

## Sheet: Figure 1D
Spleen	C57BL/6	Mertk -/-V1	Mertk -/-V2	Mertk -/-V3
Signal:Noise relative to B actin (normalized to average of C57BL/6 samples)	0.7085	0.0012	0.092	0.0386
	1.4166	0.0014	0.067	0.061
	0.8749	0.0836	0.0662	0.0862
Brain	C57BL/6	Mertk -/-V1	Mertk -/-V2	Mertk -/-V3
Signal:Noise relative to B actin (normalized to average of C57BL/6 samples)	0.8654	0.1459	0.1009	0.1187
	1.4987	0.1362	0.1321	0.1048
	0.6359	0.0248	0.0405	0.081
Testis	C57BL/6	Mertk -/-V1	Mertk -/-V2	Mertk -/-V3
Signal:Noise relative to B actin (normalized to average of C57BL/6 samples)	1.232	0.1123	0.1575	0.1176
	1.0721	0.1677	0.1035	0.1176
	0.6959	0.101	0.0055	0.0153
RPE	C57BL/6	Mertk -/-V1	Mertk -/-V2	Mertk -/-V3
Signal:Noise relative to B actin (normalized to average of C57BL/6 samples)	1	0.0355231	0.00399123	0.02
	1	0.0635663	0.0448492	0.05
	0.642588	0.07	0.02	0.07
	1.35741	0.09	0.06	0.01
PerC	C57BL/6	Mertk -/-V1	Mertk -/-V2	Mertk -/-V3
Signal:Noise relative to B actin (normalized to average of C57BL/6 samples)	1.1102	0.1012	0.1626	0.0903
	0.8596	0.1953	0.1331	0.0972
	1.0302	0.0229	0.0171	0.0056
Figure 1--Source Data 1- Quantification of independent MERTK western blot data. Total MERTK protein expression in spleen, brain, testis, retinal pigment epithelia (RPE) and peritoneal cavity (PerC) cells was measured in C57BL/6, Mertk -/-V1, Mertk -/-V2 and Mertk -/-V3 mice.
