# Supplementary material for: Tissue-specific modifier alleles determine Mertk loss-of-function traits
Source: eLife journal article supplement (doi:10.7554/elife.80530), 2022-08-15
Supplement: supp [file Figure 4_Source Data 1.xlsx]

## Sheet: Figure 4A_Tyro3mRNA in RPE
Tyro3	C57BL/6	Mertk -/-V1	Mertk -/-V2	Mertk -/-V3
(2^-ΔΔCt)	1.288	0.362	1.337	0.758
	0.961	0.271	0.944	1.298
	0.984	0.464	0.965	1.481
	1.099	0.451	0.516	1.816
	0.746	0.248		1.707
Figure 4--Source Data 1- qPCR quantification of Tyro3 mRNA levels in C57BL/6, Mertk -/-V1, Mertk -/-V2 and Mertk -/-V3 retinal pigment epithelial (RPE) cells.

## Sheet: Figure 4B_TYRO3 protein in RPE
RPE	C57BL/6	Mertk-/-V1	Mertk -/-V2	Mertk-/-V3	Tyro3 -/-V1
Signal:Noise relative to B actin (normalized to average of C57BL/6 samples)	1.0804	0.0126	0.4312	0.9588	0.025
	0.6704	0.1307	0.8318	1.4227	0.108
	0.6905	0.0156	0.7914	0.899	0.024
	0.952	0.4734	0.9793	0.6471	0.1789
	1.6067	0.439	0.5943	0.7145	0.1556
Figure 4--Source Data 1- Quantification of independent TYRO3 western blot data. Total TYRO3 protein expression in RPE cells.

## Sheet: Figure 4E_TYRO3 in RPE
RPE	C57BL/6	Tyro3-/-V1	Mertk -/-V2 Tyro3 -/-V2
Signal:Noise relative to B actin (normalized to average of C57BL/6 samples)	0.904145	0.0169547	0.0355225
	1.37461	0.0090599	0.0159836
	0.666992	0.0094854	0.0458297
	0.954248	0.0484657	0.0661849
Figure 4--Source Data 1- Quantification of independent TYRO3 western blot data. Total TYRO3 protein expression in RPE cells was measured in C57BL/6, Tyro3 -/-V1 and Mertk -/-V2 Tyro3 -/-V2 mice.

## Sheet: Figure 4G_ONL thickness
C57BL/6	Mertk -/-V1	Mertk -/-V2 Tyro3 -/-V2
33.98	4.01	2.13
33.87	5.15	3.97
34.36	5.1	3.22
34.53	2.56
34.93	5.04
35.9	4.97
Figure 4--Source Data 1- Quantification of outer nuclear layer (ONL) thickness in the area indicated in A. Mean ± SEM of 10 measurements/mouse, n=6 mice/genotype. ****p<0.0001, ANOVA-Dunnet’s test.

## Sheet: Figure 4I_a wave amplitude
C57BL/6	Mertk -/-V1	Mertk -/-V2 Tyro3 -/-V2
68.056	16.932	7.808
54.438	4.819	6.098
77	32.384	6.667
65.669		9.763
99
Figure 4--Source Data 1- Quantification of a-wave amplitude at max luminance, n=3-5 mice/ genotype.

## Sheet: Figure 4I_b wave amplitude
C57BL/6	Mertk -/-V1	Mertk -/-V2 Tyro3 -/-V2
181.101	39.236	26.226
296.218	37.9	85.976
155.938	36.445	140.556
175		28.402
126.606
Figure 4--Source Data 1- Quantification of b-wave amplitude at max luminance, n=3-5 mice/ genotype.

## Sheet: Figure 4I_a wave amp vs lum
luminance (log2 cd.s/m2)	C57BL/6					Mertk -/-V1			Mertk -/-V2 Tyro3 -/-V2
-2.1	3.709	3.485	14.344	1.97	3.937	4.607	10.119	7.09	6.119	13.293	3.911	16.517
-0.6	50.588	38.974	50.518	44.444	4.781	3.393	5.606	4.092	1.352	1.313	5.422	32.622
0.4	128.088	60.965	56.731	25.709	89.516	2.647	26.037	6.175	14.502	22.985	10.303	18.619
1.4	168.519	54.438	102.101	92.455	150	6.845	32.384	7.09	7.808	6.098	6.667	9.763
Figure 4--Source Data 1- Quantification of a-wave amplitude at increasing luminances, n=3-5 mice/ genotype.
