# Supplementary figures and images for: Tissue-specific modifier alleles determine Mertk loss-of-function traits
Source: eLife journal article supplement (doi:10.7554/elife.80530), 2022-08-15

**A**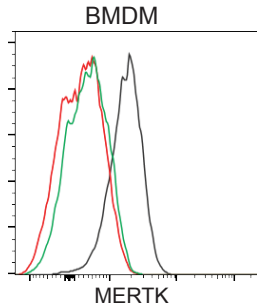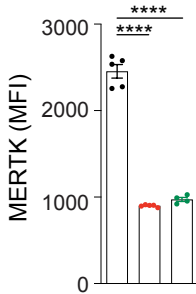**B**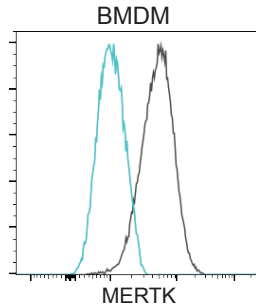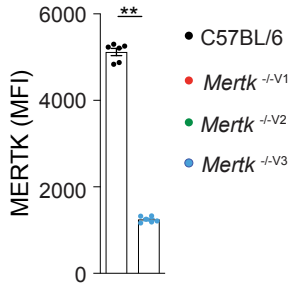

Supplement: supp [file elife-80530-supp-v1.zip]

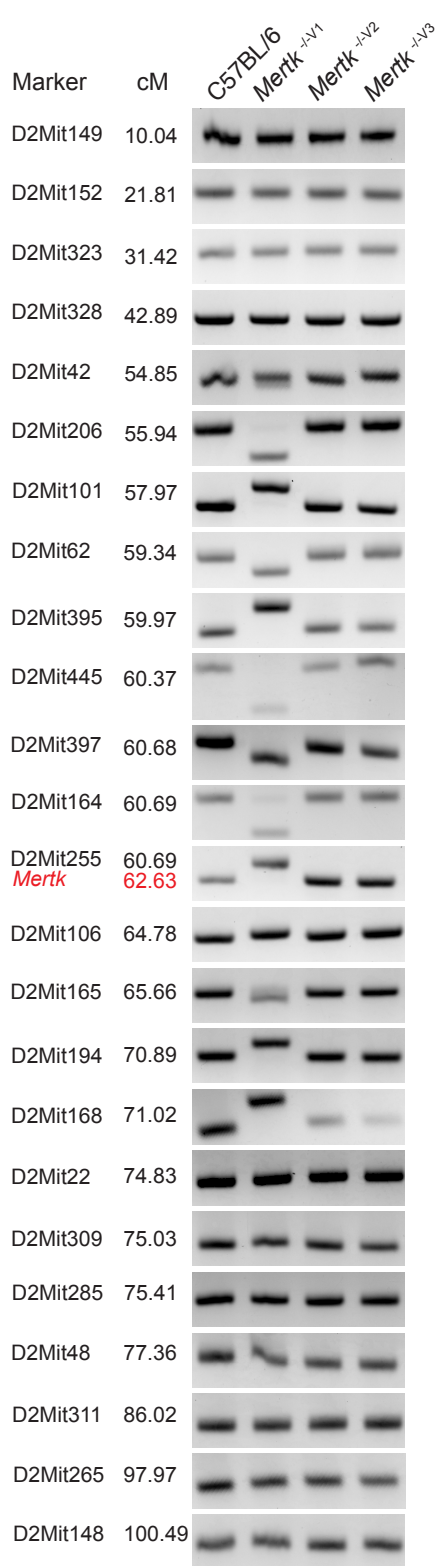

Supplement: supp [file elife-80530-supp-v1.zip]

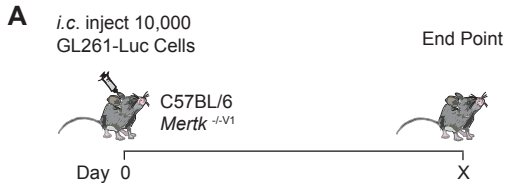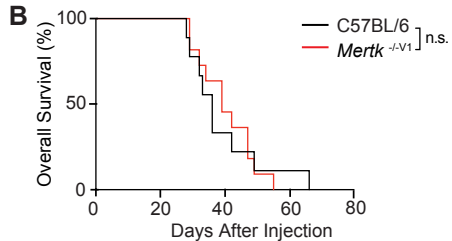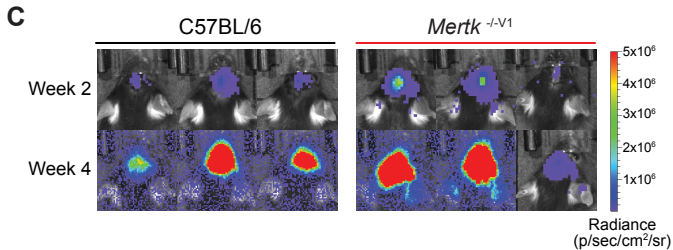

Supplement: supp [file elife-80530-supp-v1.zip]
